# Supplementary material for: Role of the p38 MAPK/C/EBPβ Pathway in the Regulation of Phenotype and IL-10 and IL-12 Production by Tolerogenic Bone Marrow-Derived Dendritic Cells
Source: PubMed Central journal article supplement (PMC6316502; doi:10.3390/cells7120256), 2018-12-07
Supplement: cells-07-00256-s001.pdf [file cells-07-00256-s001.pdf]

| <b>Genes of interest</b> | <b>Forward primers</b>         | <b>Reverse primers</b>           | <b>Tm (oC)</b> |
|--------------------------|--------------------------------|----------------------------------|----------------|
| IL-12p35                 | CTCCTAAACCACCTCAGTTTGGCCAGGGTC | TAGATGCTACAAGGCACAGGGTCA TCATC   | 60             |
| IL-12p40                 | CACTCATGGCCATGTGGGAGCTGGAGAAAG | TCCGGAGTAATTTGGTGCCTTCACACC TCAG | 60             |
| IL-10                    | TACCTGGTAGAAGTGATGCC           | CATCATGTATGCTTCTATGC             | 64             |
| $\beta$ -Actin           | ACCCACACTGTGCCCATCTA           | TCATGGATGCCACAGGATTC             | 55-65          |

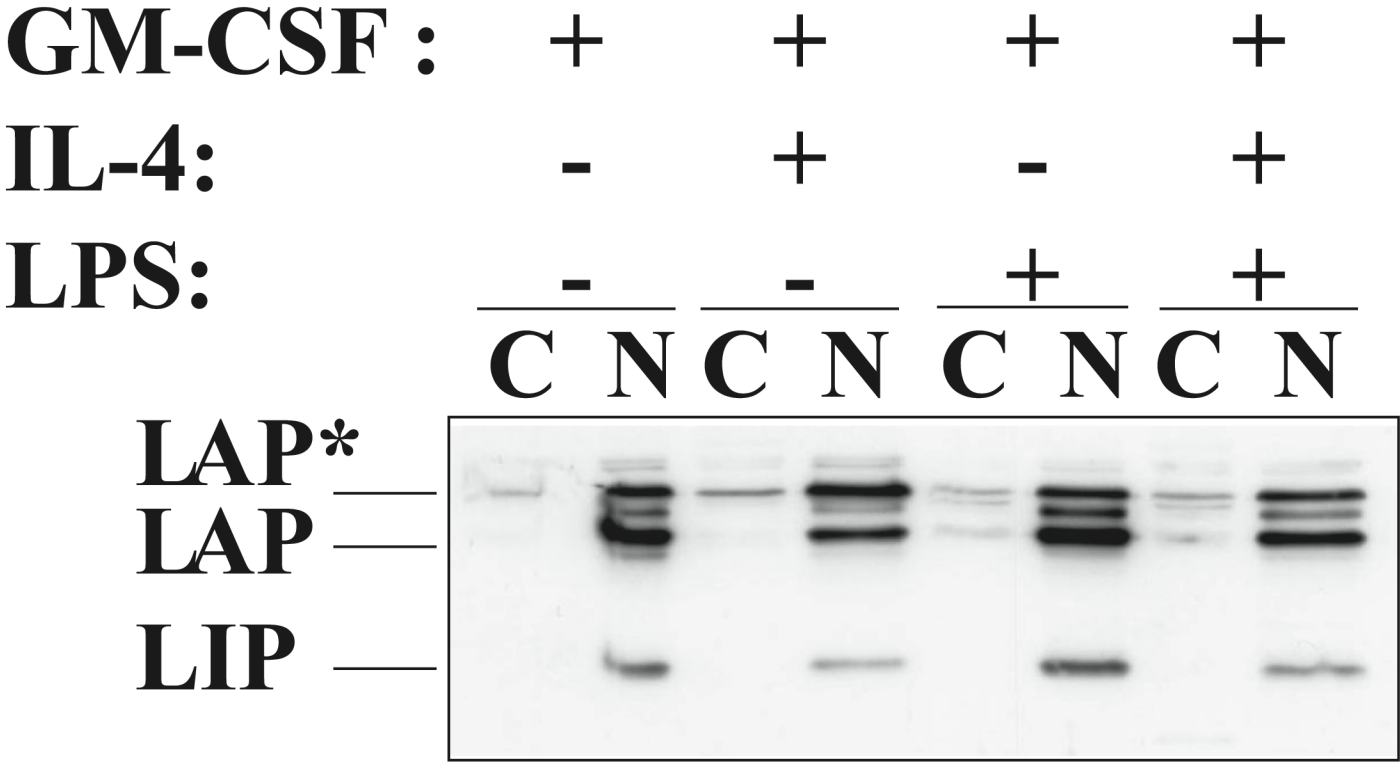

**Guindi et al. Suppl. Figure 1**

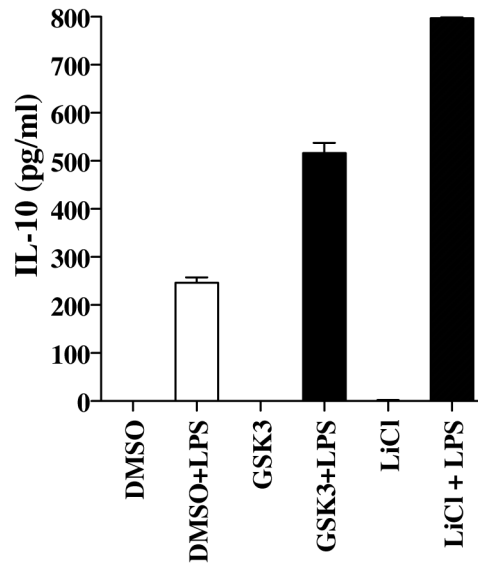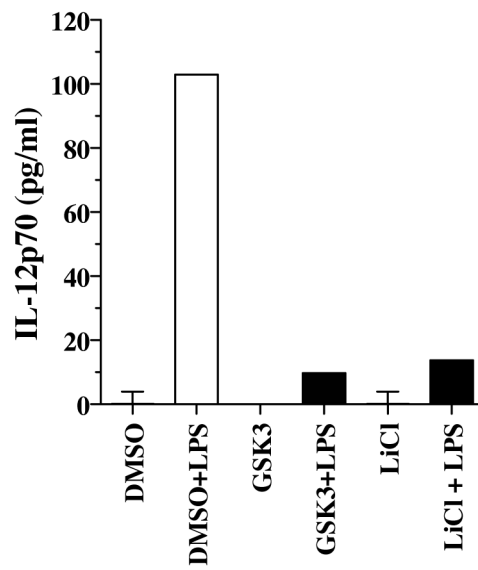

**Guindi et al. Suppl. Figure 2**
